# Supplementary material for: Identification of the role of a MAP kinase Tmk2 in Hypocrea jecorina (Trichoderma reesei)
Source: PubMed Central journal article supplement (PMC4206845; doi:10.1038/srep06732), 2014-10-23
Supplement: srep06732-s1.pdf [file srep06732-s1.pdf]

**Identification of the role of a MAP kinase Tmk2 in *Hypocrea jecorina***

**(*Trichoderma reesei*)**

Mingyu Wang <sup>1,2</sup>, Yanmei Dong <sup>1</sup>, Qiushuang Zhao <sup>1</sup>, Fangzhong Wang <sup>1</sup>, Kuimei Liu<sup>1</sup>,  
Baojie Jiang <sup>1</sup>, Xu Fang <sup>1,2,\*</sup>

1. State Key Laboratory of Microbial Technology, School of Life Sciences, Shandong  
University, Jinan 250100, China

2. National Glycoengineering Research Center, Shandong University, Jinan 250100,  
China

\* To whom correspondence is addressed. E-mail: fangxu@sdu.edu.cn

Tel: +86-531-88364004, Fax: +86-531-88364363

**Supplementary Information 1-4**

## Supplementary Information 1. Sequence alignment between Tmk2 from *H.*

### *jecorina* and Slt2 from *S. cerevisiae*

```
Tmk2      MADLQGRKVFVKVFNQDFVVDERYTVTKELGQGAYGIVCAAVNNQTNEG--VAIKKVTNVE
Slt2      MADKIERHTFKVFNQDFSVDKRFQLIKEIGHGAYGIVCSARFAEAAEDTTVAIKKVTNVE
          ***      *:.***** **:* : **:*:*****:*      :.  *****

Tmk2      SKKILAKRALREIKLLQHFRGHRNITCLYDMDIP-RPD-NFNETYLYEELMECDLAAIIR
Slt2      SKTLLCKRSLRELKLLRHFRGHKNITCLYDMDIVFYPDGSINGLYLYEELMECDMHQIIK
          **.:*.**:*:***:***:*****:***** ** .:* *****: **

Tmk2      SGQPLTDAHFQSFYQILCGLKYIHSANVLHRDLKPGNLLVNADCELKICDFGLARGFSV
Slt2      SGQPLTDAHYQSFTYQILCGLKYIHSADVLHRDLKPGNLLVNADCQLKICDFGLARGYSE
          *****:*** *****:*****:*****:*****:

Tmk2      DPEENAGYMTEYVATRWRAPAIMLSFQSYTKAIDVWSVGCILAELLGGRPFKGRDYVD
Slt2      NPVENSQFLTEYVATRWRAPAIMLSYQGYTKAIDVWSAGCILAFLGGKPIFKGKDYVN
          :* **: :*:*****:*.*****.*****:***:*:***:***:

Tmk2      QLNQILHILGTPNEETLRRIGSPRAQEYVRNLPFMPKPPFALFPDANPDALDLDKMLA
Slt2      QLNQILQVLGTPPDETLRRIGSKNVQDYIHQLGFIPKVPFVNLYPNANSQALDLEQMLA
          *****:***** :***** ..*:*::* *:* ** *:*:***:*****:***

Tmk2      FDPSQRISVEQALEHPYLHIWHDASDEPDCPTTFNDFEVVEDVGEKRMILDEVLRFRQ
Slt2      FDPQKRITVDEALEHPYLSIWHDDAPEVPCSEKFEFESVNDMEDLKQMVIQEVQDFRL
          ***.:**:*:***** *****.:*** *. .*:*.** *:*: ::*:::** **

Tmk2      LVRT-----APASGNQGAGQQIQVPLPSAGGQWTAED-----
Slt2      FVRQPLLEEQRQLQLQQQQQQQQQQQQQQPSDVDNGNAAASEENYPKQMATSNVAPQ
          :**      . :* ** * * .*: :*.:

Tmk2      -----PRPQEYMGQP-----NG----LEQELQAGMD
Slt2      QESFGIHSQNLPRHDADFPPRPQESMMEMRPATGNTADIPPQNDNGTLLDLEKELEFGLD
          ***** * :      **      **:*: *:*

Tmk2      IRR-
Slt2      RKYF
          :
```

**Supplementary Information 2. Sequence alignment between Tmk2 and Tmk3 from *H. jecorina*.**

```

Tmk2      MADLQGRKVKFVFNQDFVVDERYTVTKELGQGAYGIVCAAVNNQTNEGVAIKKVTNVFSK
Tmk3      MAEFVVR--AQIFGTTFEITSRYSDLQFVGMGAFGLVCSARDQLTNQNVAVKKIMKPFST
          **:::      **:.*  * : .**:  : :* **:*:**:* : : **:.**:**: : **.

Tmk2      KILAKRALREIKLLQHFRGHRNITCLYDMDIPRPNDFNETYLYEELMECDLAAIIRSGQP
Tmk3      PVLAKRTYRELKLLKHLR-HENVISLSDIFISP---LEDIYFVTELLGTDLHRLTTS-RP
          :****: **:***:*:* *.*: .* *: *.      ::: *: **: **  : : * :*

Tmk2      LTDAHFQSFYIYQILCGLKYIHSANVLHRDLKPGNLLVNADCELKICDFGLARGFSVDPEE
Tmk3      LEKQFIQYFLYQIMRGLKYVHSAGVVHRDLKPSNILVNENCDLKICDFGLAR--IQDPQ-
          * . .:* *:**: ****:*:*.*:*****.*:** *:*:**:***** **

Tmk2      NAGYMTEYVATRWRAPPEIMLSFQSYTKAIDVWSVGCILAEELGGRPFKGRDYVDQLNQ
Tmk3      ----MTGYVSTRYYRAPEIMLTWQKYDVEVDIWSAGCIFAEMLEGKPLFPGKDHVNQFSI
          ** **.*:**:*****:.*.*      :*:*.*:**:***.* *:*:* *:*:**:*.

Tmk2      ILHILGTPNEETLRRIGSPRAQEYVRNLPFMPKKPFPPALFPDANPDALDLLDKMLAFDPS
Tmk3      ITELLGTPDDVINTIASENTLRFVKS LPKRERQPLRNKFKNADDSAVDLLERMLVFDPK
          * .:**** :::.. *.* .: .:*.**      :*: * :*: .:*:**:***.***.

Tmk2      QRISVEQALEHPYLHIWHDASDEPDCPTTFNDFEVVED-VGEMRKMI LDEVLRFRQLVR
Tmk3      KRITATEALAEHYLAPYHDPTDEPVAEKFDWSFNDADLPVDTWKIMMYSEILDYHNIEG
          :**:. :** * ** :*:*:**. . *::.*: .: * . : * :*:* ::::

Tmk2      TAPASGNQGAGQQIQVPLPSAGGQWTAEDPRPQEYMGQPNGLEQELQAGMDIRR
Tmk3      GVPNMDEQFPFQ-----
          .* .:* . *

```

**Supplementary Information 3. Colony diameters of *H. jecorina* parent and**

***Δtmk2* strains grown on plates.** All values are expressed in mean±s.d. (n=4 for PDA plates, n=19 for *H. jecorina* parent strain grown on glucose plates, n=17 for *H. jecorina Δtmk2* grown on glucose plates, n=3 for all other plates).

| Plates         | Parent (mm) | <i>Δtmk2</i> (mm) | Plates                                 | Parent (mm) | <i>Δtmk2</i> (mm) |
|----------------|-------------|-------------------|----------------------------------------|-------------|-------------------|
| PDA            | 78.0±0.8    | 28.5±2.1          | PDA+1 mM H <sub>2</sub> O <sub>2</sub> | 63.0±5.0    | 28.3±7.5          |
| PDA+0.2 M NaCl | 59.7±5.8    | 30.3±0.6          | PDA+2 mM H <sub>2</sub> O <sub>2</sub> | 46.3±10.2   | 22.3±1.2          |
| PDA+0.4 M NaCl | 43.3±2.9    | 27.0±1.0          | PDA+3 mM H <sub>2</sub> O <sub>2</sub> | 0.0±0.0     | 0.0±0.0           |
| PDA+0.6 M NaCl | 34.3±2.1    | 24.3±0.6          | PDA+4 mM H <sub>2</sub> O <sub>2</sub> | 0.0±0.0     | 0.0±0.0           |
| PDA+0.8 M NaCl | 23.3±0.6    | 18.3±1.2          | Lactose                                | 33.0±1.0    | 23.7±0.6          |
| PDA+1.0 M NaCl | 14.0±0.0    | 11.3±0.6          | Glucose                                | 48.4±2.5    | 21.5±0.9          |
| Glycerol       | 23.0±1.7    | 16.7±0.6          | Avicel                                 | 59.3±1.5    | 37.3±1.1          |

**Supplementary Information 4. Primers used in real-time PCR reactions and amplicon sizes.**

| Primer          | Sequence (5' to 3')      | Amplicon size (bp) |
|-----------------|--------------------------|--------------------|
| actin-F         | TTAAGAAAGCCGCCACCCCC     | 134                |
| actin-R         | GTTGGTTCGACAGGGAGAGGATG  |                    |
| cbh1-F          | CTGCGACTGGAACCCATAACC    | 132                |
| cbh1-R          | AAGTGACGCCATTCTGGACAT    |                    |
| cbh2-F          | CGTTGCTGGATTCGTTTGTC     | 178                |
| cbh2-R          | GATGGGTTTGCGTTTGTGAG     |                    |
| egl1-F          | CCCAGAGTCCATCCCAAG       | 100                |
| egl1-R          | TCCAGCGGTAGTTCCAGTCAA    |                    |
| egl2-F          | CAACGACGACGGGATGACTA     | 246                |
| egl2-R          | GATGCCAACTGCGACCAAA      |                    |
| bgl1-F          | TGGGCGGGTCTTCCTTC        | 104                |
| bgl1-R          | GGGCTCTTCGCAATGGTGTA     |                    |
| xyr1-F          | ACAGTGGAGCGGTAACAGACA    | 209                |
| xyr1-R          | CACGAATCCTTCCGACGAG      |                    |
| cre1-F          | CTCCTTCTTCTCCACCTT       | 140                |
| cre1-R          | CTGCAGGGACAGGTTTCT       |                    |
| ace1-F          | AGACCCTGATCTTCATGGCAC    | 110                |
| ace1-R          | GTCGGTGAGATATTCGACTGT    |                    |
| ace2-F          | TCAACATCCTCCACCACCAG     | 117                |
| ace2-R          | CTTGAGACGTGATGCATGTC     |                    |
| Trire2_112271-F | TCTTCATCGCAGTCAAGGCCATC  | 204                |
| Trire2_112271-R | TAGGCGTCAGGAGCATGTACTGG  |                    |
| Trire2_58188-F  | GCGAACCTTCCCAAGAGAAAGC   | 251                |
| Trire2_58188-R  | CGACATAGAAGGTGAAGGCGA    |                    |
| Trire2_55341-F  | CCATGGACCGTTGAGCCAATACTT | 203                |
| Trire2_55341-R  | AGATGAACTCGGGGACGGAATCG  |                    |
| Trire2_51492-F  | ATGGCTACAAGTCCTTCCGTACC  | 118                |
| Trire2_51492-R  | GAAGCAGTTCCACGAAACCAGAC  |                    |
| Trire2_124228-F | TAGTGACGCTACCACTTCCGAGC  | 266                |
| Trire2_124228-R | CACCGAGTTGATGGCCGTGAT    |                    |
| Trire2_67600-F  | CAACGACGTGATGACCCAGCA    | 195                |
| Trire2_67600-R  | TCGTTGGAGATGCTACCGAGG    |                    |
| Trire2_122172-F | ATGGTTGGCCTTCCGAGCGA     | 172                |
| Trire2_122172-R | GGAGAGCTTCGGTGGCACTATTG  |                    |

|                 |                          |     |
|-----------------|--------------------------|-----|
| Trire2_71563-F  | TGCGTTGTCTTGGGCTCTCTG    | 194 |
| Trire2_71563-R  | AGG TTCAGAGACAGAGTCACGCC |     |
| Trire2_122993-F | AATGTCGTCGGCTGCCTACTC    | 206 |
| Trire2_122993-R | TCATCGCTCCTCTCATCCCGT    |     |
| fks-F           | CAACCAGAAGCCTACCGACTCTC  | 225 |
| fks-R           | CCCTCGAGCAAGAAGAGCACT    |     |
